# Supplementary material
Source: Copernicus journal article supplement (doi:10.5194/esurf-14-361-2026)
Supplement: Supplementary file 1 [file esurf-14-361-2026-supplement.pdf]

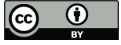

*Supplement of*

## **First Alps-wide reconstruction of LGM glacial sediment transport enabled by GPU-accelerated particle tracking**

**Tancrede P. M. Leger et al.**

*Correspondence to:* Tancrede P. M. Leger ([tancrede.leger@unil.ch](mailto:tancrede.leger@unil.ch))

The copyright of individual parts of the supplement might differ from the article licence.

### Map of hydrological basins used for "sink-to-source" analysis

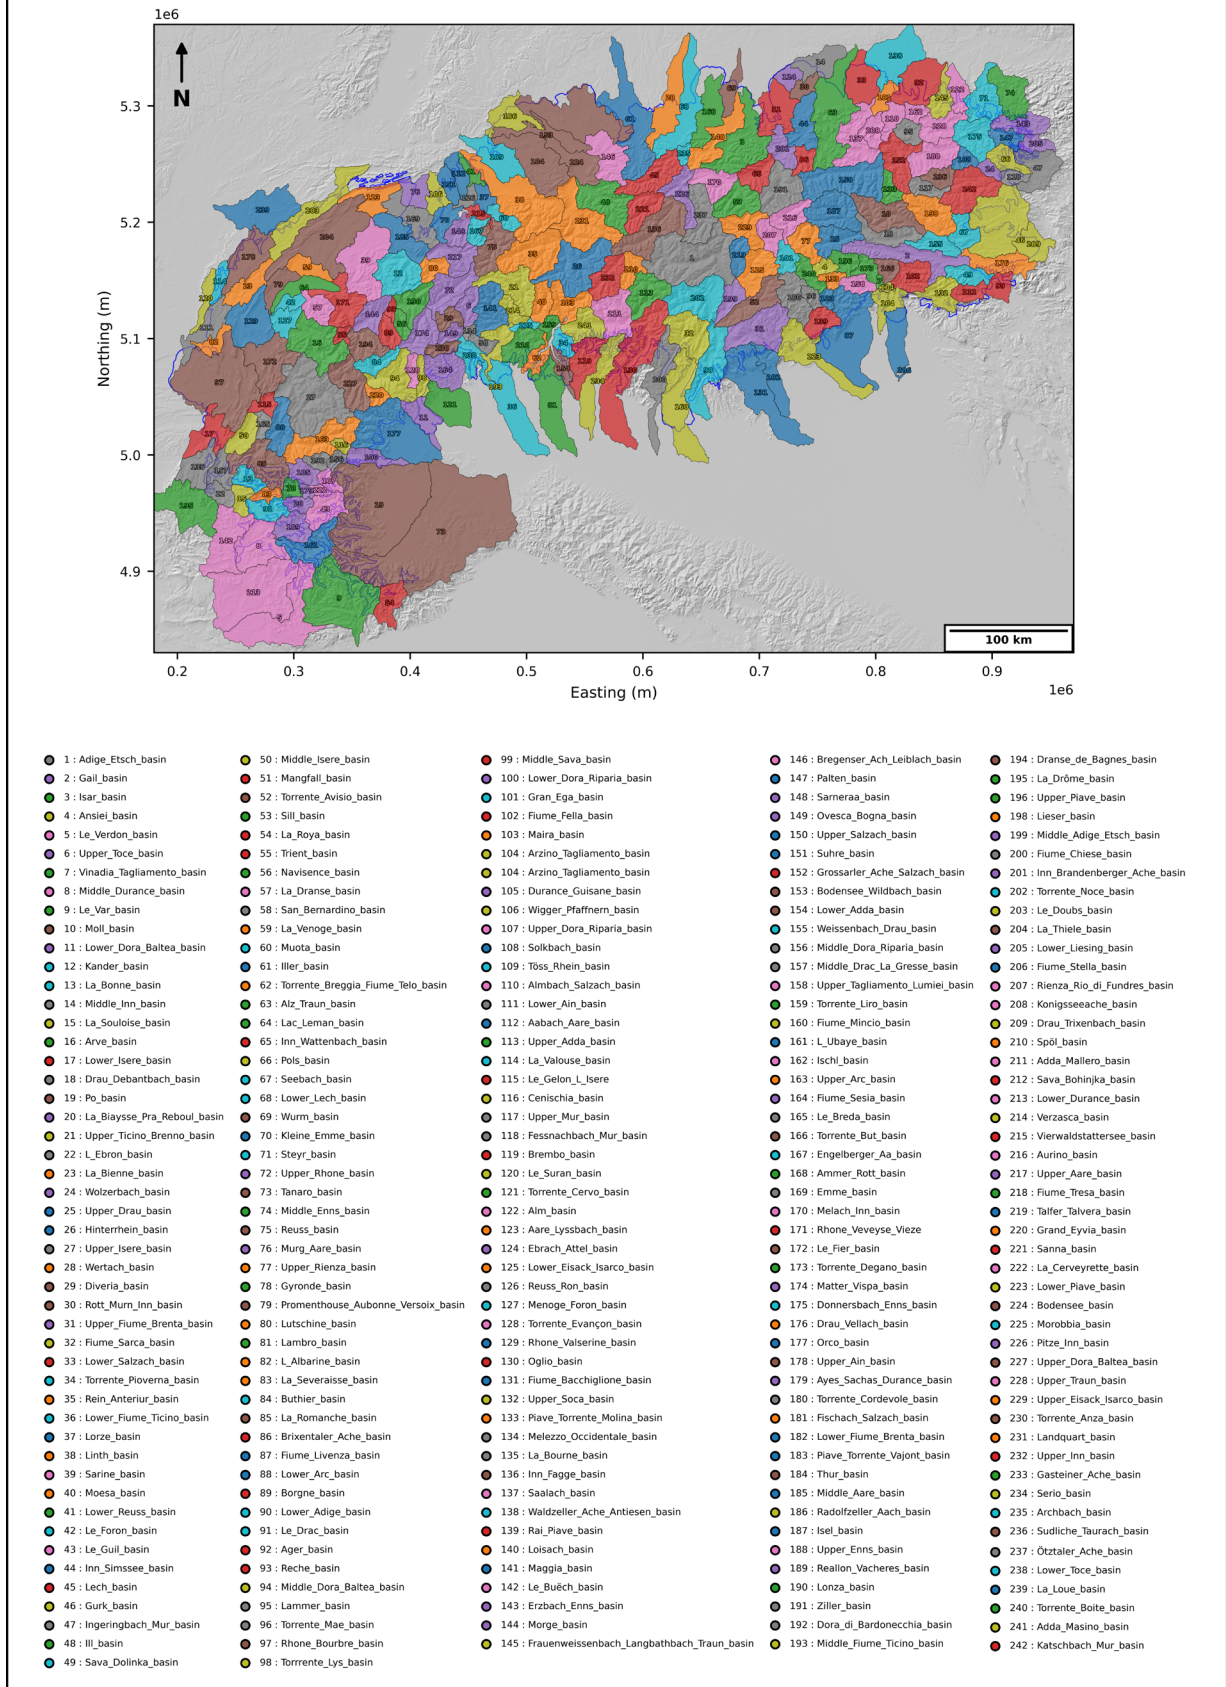

**Figure S1.** Map and naming convention for all hydrological catchments (n = 242) used to divide our domain into sections and thus quantify the different provenance fractions of modelled ice-contact deposits within our sink-to-source analysis. The hydrological basins were obtained from the global HydroBASINS database (Lehner & Grill, 2013), using a combination of watershed product levels 8 and 9 (more details in Lehner & Grill, 2013).

**Table S1.** Model-data comparison assessing the agreement between source-to-sink trajectories of specific Alpine surface lithologies versus TCN-dated erratic boulders.

| Erratic lithology                | Reference                         | Sample name                                                                                    | Latitude (dd) | Longitude (dd) | Elevation (m a.s.l.) | Exposure age (+/- external uncertainties, yr BP) * | Overlap with modelled trajectories ? **<br>Complex seeding (subglacial & supraglacial schemes)                                             | Overlap with modelled trajectories ? **<br>'Simple' seeding scheme only                                                                    |
|----------------------------------|-----------------------------------|------------------------------------------------------------------------------------------------|---------------|----------------|----------------------|----------------------------------------------------|--------------------------------------------------------------------------------------------------------------------------------------------|--------------------------------------------------------------------------------------------------------------------------------------------|
| Central Aar granite              | Reber et al. (2014)               | Reuss-21                                                                                       | 47.3952       | 8.1947         | 446                  | 22030 +/- 1410                                     | Yes (only by Central Aar granites)                                                                                                         | Yes (only by Central Aar granites)                                                                                                         |
| Central Aar granite              | Reber et al. (2014)               | Reuss-22                                                                                       | 47.3955       | 8.1883         | 475                  | 22270 +/- 1500                                     | Yes (only by Central Aar granites)                                                                                                         | Yes (only by Central Aar granites)                                                                                                         |
| Amphibolite                      | Kamleitner et al. (2023)          | Reuss43                                                                                        | 47.3957       | 8.2698         | 536                  | 18886 +/- 3627                                     | Yes (by Hercynian amphibolites and other lithologies)                                                                                      | No, closest trajectories are 2.2 km away                                                                                                   |
| Arolla Gneiss                    | Graf et al. (2015)                | GRI-1                                                                                          | 47.0646       | 6.8392         | 1090                 | 22640 +/- 1720                                     | No, closest trajectories are 6 km away (central Aar granite)                                                                               | No, closest trajectories are 6 km away (central Aar granite)                                                                               |
| Central Gneiss                   | Bichler et al. (2016)             | SON2                                                                                           | 47.0564       | 12.9805        | 2229                 | 18910 +/- 2860                                     | Yes                                                                                                                                        | Yes                                                                                                                                        |
| Central Gneiss                   | Bichler et al. (2016)             | DUR2                                                                                           | 47.0758       | 12.9834        | 1643                 | 26380 +/- 3250                                     | Yes                                                                                                                                        | No, closest trajectories are 2.3 km away                                                                                                   |
| Granite                          | Boxleitner et al. (2019)          | Wassen4                                                                                        | 46.7080       | 8.6030         | 904                  | 18300 +/- 1310                                     | Yes (only by Central Aar granites)                                                                                                         | Yes (only by Central Aar granites)                                                                                                         |
| Granite                          | Gianotti et al. (2008)            | Ivrea1                                                                                         | 45.4940       | 7.8790         | 325                  | 20430 +/- 3280                                     | Yes (only by Mt. Blanc granites)                                                                                                           | Yes (only by Mt. Blanc granites)                                                                                                           |
| Granite                          | Gianotti et al. (2008)            | Ivrea6                                                                                         | 45.4810       | 7.8830         | 317                  | 24240 +/- 2130                                     | Yes (only by Mt. Blanc granites)                                                                                                           | Yes (only by Mt. Blanc granites)                                                                                                           |
| Granite                          | Ivy-Ochs et al. (2018)            | SM4                                                                                            | 45.0928       | 7.2815         | 821                  | 19360 +/- 2190                                     | No, there is no mapped granite outcrops anywhere near this valley and glacier catchment in Italian geological maps used within this study. | No, there is no mapped granite outcrops anywhere near this valley and glacier catchment in Italian geological maps used within this study. |
| Granite                          | Kamleitner et al. (2023)          | Reuss45                                                                                        | 47.4358       | 8.3074         | 531                  | 18230 +/- 1360                                     | Yes (only by Central Aar granites)                                                                                                         | Yes (only by Central Aar granites)                                                                                                         |
| Granite                          | Kamleitner et al. (2023)          | Reuss40                                                                                        | 47.3959       | 8.2300         | 473                  | 20250 +/- 1620                                     | Yes (only by Central Aar granites)                                                                                                         | Yes (only by Central Aar granites)                                                                                                         |
| Granite                          | Kamleitner et al. (2023)          | Reuss46                                                                                        | 47.4406       | 8.3035         | 546                  | 21660 +/- 1590                                     | Yes (only by Central Aar granites)                                                                                                         | Yes (only by Central Aar granites)                                                                                                         |
| Granite                          | Prudhomme et al. (2020)           | VAU12_B 1_06                                                                                   | 45.9093       | 6.76412        | 1037                 | 23050 +/- 2120                                     | Yes (only by Mt. Blanc granites)                                                                                                           | Yes (only by Mt. Blanc granites)                                                                                                           |
| Granite                          | Roattino et al. (2023)            | MIR20-02                                                                                       | 45.4550       | 5.6935         | 788                  | 23260 +/- 1460                                     | Yes (only by Belledonne granites)                                                                                                          | No, closest trajectories are 7.6 km away (Belledone granites)                                                                              |
| Granite                          | Kamleitner et al. (2022)          | VR14                                                                                           | 45.8518       | 8.5048         | 818                  | 18000 +/- 1600                                     | No but trajectories are within 3 km (modelled LGM not extensive enough), only by Central Aar granites                                      | No but trajectories are within 3 km (modelled LGM not extensive enough), only by Central Aar granites                                      |
| Granite                          | Braakhekke et al. (2020)          | Briallo33                                                                                      | 45.7780       | 8.3790         | 517                  | 24020 +/- 2960                                     | No but yes with Arolla Gneiss                                                                                                              | No                                                                                                                                         |
| Granite                          | Kamleitner et al. (2023)          | Reuss35                                                                                        | 47.3738       | 8.2713         | 548                  | 19110 +/- 1220                                     | Yes (only by Central Aar granites)                                                                                                         | Yes (only by Central Aar granites)                                                                                                         |
| Granite                          | Kamleitner et al. (2023)          | Reuss39                                                                                        | 47.3449       | 8.3139         | 460                  | 20750 +/- 1660                                     | Yes (only by Central Aar granites)                                                                                                         | Yes (only by Central Aar granites)                                                                                                         |
| Granite                          | Kamleitner et al. (2023)          | Reuss30                                                                                        | 47.4493       | 8.2785         | 435                  | 21130 +/- 1380                                     | Yes (only by Central Aar granites)                                                                                                         | Yes (only by Central Aar granites)                                                                                                         |
| Granite                          | Kamleitner et al. (2022)          | VR43                                                                                           | 45.8437       | 8.5065         | 764                  | 21710 +/- 1320                                     | No but trajectories are within 3 km (modelled LGM not extensive enough), only by Central Aar granites                                      | No but trajectories are within 3.5 km (modelled LGM not extensive enough), only by Central Aar granites                                    |
| Granite                          | Kamleitner et al. (2022)          | VR29                                                                                           | 45.8448       | 8.5049         | 805                  | 23180 +/- 1370                                     | No but trajectories are within 3 km (modelled LGM not extensive enough), only by Central Aar granites                                      | No but trajectories are within 3.5 km (modelled LGM not extensive enough), only by Central Aar granites                                    |
| Granite                          | Kamleitner et al. (2022)          | VR28                                                                                           | 45.8455       | 8.5048         | 805                  | 23500 +/- 1370                                     | No but trajectories are within 3 km (modelled LGM not extensive enough), only by Central Aar granites                                      | No but trajectories are within 3.5 km (modelled LGM not extensive enough), only by Central Aar granites                                    |
| Granite                          | Kamleitner et al. (2022)          | VR44                                                                                           | 45.8452       | 8.5058         | 797                  | 29550 +/- 1720                                     | No but trajectories are within 3 km (modelled LGM not extensive enough), only by Central Aar granites                                      | No but trajectories are within 3.5 km (modelled LGM not extensive enough), only by Central Aar granites                                    |
| Granite                          | Reber et al. (2014)               | Reuss-20                                                                                       | 47.3476       | 8.3144         | 502                  | 18630 +/- 1300                                     | Yes (only by Central Aar granites)                                                                                                         | Yes (only by Central Aar granites)                                                                                                         |
| Granite                          | Wüthrich et al. (2018)            | BS6                                                                                            | 46.9400       | 7.5305         | 762                  | 18220 +/- 1020                                     | Yes (only by Central Aar granites)                                                                                                         | Yes (only by Central Aar granites)                                                                                                         |
| Granite                          | Wüthrich et al. (2018)            | BS2                                                                                            | 46.8859       | 7.4886         | 729                  | 18760 +/- 1700                                     | Yes (only by Central Aar granites)                                                                                                         | Yes (only by Central Aar granites)                                                                                                         |
| Granite                          | Wüthrich et al. (2018)            | GS3                                                                                            | 46.8515       | 7.4744         | 937                  | 19560 +/- 1330                                     | Yes (only by Central Aar granites)                                                                                                         | Yes (only by Central Aar granites)                                                                                                         |
| Granite                          | Wüthrich et al. (2018)            | GSI                                                                                            | 46.8664       | 7.4716         | 873                  | 20410 +/- 1980                                     | Yes (only by Central Aar granites)                                                                                                         | Yes (only by Central Aar granites)                                                                                                         |
| Hornblende granite               | Ivy-Ochs et al. (2004)            | ER7                                                                                            | 47.1400       | 7.6800         | 610                  | 19850 +/- 1720                                     | Yes (only by Central Aar granites)                                                                                                         | Yes (only by Central Aar granites)                                                                                                         |
| Hornblende granite               | Ivy-Ochs et al. (2004)            | ER1                                                                                            | 47.1592       | 7.6868         | 580                  | 23920 +/- 1900                                     | Yes (by Central Aar and Mt. Blanc granites)                                                                                                | Yes (only by Central Aar granites)                                                                                                         |
| Hornblende granite               | Ivy-Ochs et al. (2004)            | ER2                                                                                            | 47.1586       | 7.6828         | 585                  | 24030 +/- 1630                                     | Yes (by Central Aar and Mt. Blanc granites)                                                                                                | Yes (only by Central Aar granites)                                                                                                         |
| Mt. Blanc Granite                | Graf et al. (2015)                | PBOL-1                                                                                         | 46.7803       | 6.4891         | 1190                 | 20990 +/- 1670                                     | Yes: overlap with Central Aar granites trajectories which are undifferentiable (Mt. Blanc granite trajectories are within 5 km)            | No but trajectories are within 2 km (only by Central Aar granites though)                                                                  |
| Mt. Blanc Granite                | Graf et al. (2015)                | PAB-1                                                                                          | 47.0037       | 6.9104         | 710                  | 21360 +/- 1650                                     | Yes: overlap with Central Aar granites trajectories which are undifferentiable (Mt. Blanc granite trajectories are within 1.6 km)          | Yes: overlap with Central Aar granites trajectories which are undifferentiable                                                             |
| Mt. Blanc Granite                | Graf et al. (2015)                | VDR-1                                                                                          | 47.0893       | 6.9645         | 990                  | 31840 +/- 3040                                     | No, closest trajectories are 5 km away (central Aar granite)                                                                               | No, closest trajectories are 6 km away (central Aar granite)                                                                               |
| Serpentine                       | Kamleitner et al. (2022)          | VR52                                                                                           | 45.6907       | 8.5763         | 326                  | 25266 +/- 4135                                     | No, closest serpentinite trajectories are 16 km away                                                                                       | No, closest serpentinite trajectories are 16 km away                                                                                       |
| Serpentine                       | Kamleitner et al. (2022)          | VR33                                                                                           | 45.7963       | 8.5021         | 612                  | 26200 +/- 6832                                     | No, closest serpentinite trajectories are 8 km away                                                                                        | No, closest serpentinite trajectories are 8 km away                                                                                        |
| Serpentine                       | Kamleitner et al. (2022)          | VR51                                                                                           | 45.7069       | 8.5311         | 336                  | 27815 +/- 8677                                     | No, closest serpentinite trajectories are 12 km away                                                                                       | No, closest serpentinite trajectories are 11.5 km away                                                                                     |
| <b>Summary (complex seeding)</b> | <b>Model-data fit: 26/38 ~68%</b> | <b>Model-data fit would be obtained with small (&lt;4 km) improvement in extent: 5/38 ~13%</b> |               |                |                      | <b>No model-data fit: 7/38 ~18%</b>                |                                                                                                                                            |                                                                                                                                            |
| <b>Summary (simple seeding)</b>  | <b>Model-data fit: 22/38 ~58%</b> | <b>Model-data fit would be obtained with small (&lt;4 km) improvement in extent: 6/38 ~16%</b> |               |                |                      | <b>No model-data fit: 10/38 ~26%</b>               |                                                                                                                                            |                                                                                                                                            |

\* All exposure ages were re-calculated as part of the compilation of geochronological data for the AlpIce database (Kamleitner *et al.*, in prep).

\*\* An overlap between the dated erratic and modelled particle trajectories is defined as such when trajectories of the matching lithology are within a 1 km radius of the erratic location.

Note: only erratic boulders that were dated to between 40 and 18 ka (the time frame of our simulations), and published in peer-reviewed journals, were compiled. Moreover, duplicate samples (with identical or close-by coordinates) were removed. We only keep one sample per study site.

# Alps-wide map of source-to-sink particle trajectories (per lithology)

## Subglacial seeding

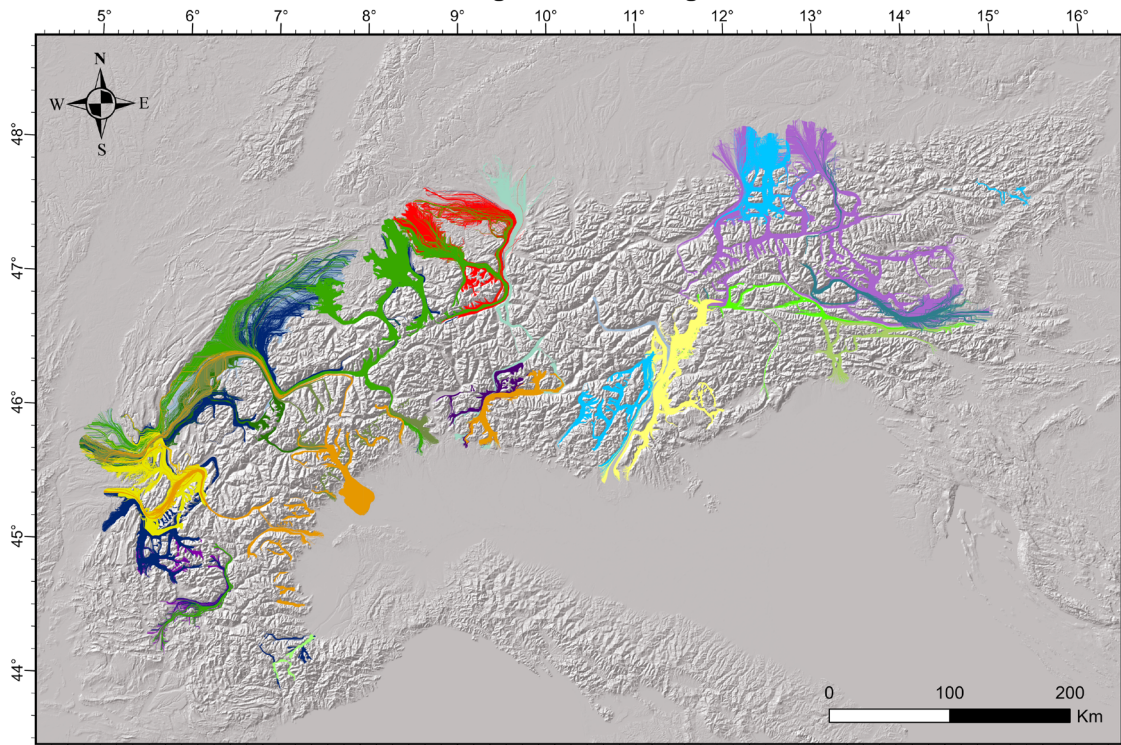

## Supraglacial seeding

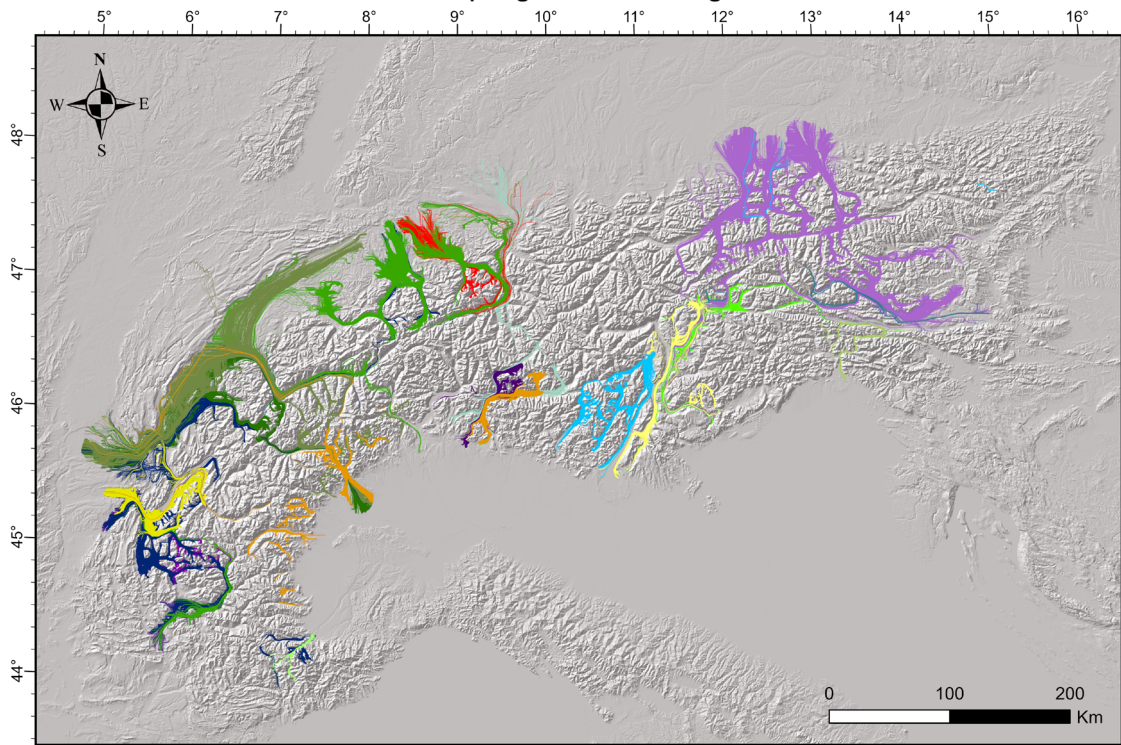

- |                              |                                                         |                                     |
|------------------------------|---------------------------------------------------------|-------------------------------------|
| ● 1 : Adamello_tonalite      | ● 9 : Combeynot_pink-green_granite                      | ● 16 : Julier_granites              |
| ● 2 : Antigorie_serpentinite | ● 10 : Eclogite-facies_Allalin_Gabbro                   | ● 17 : Mont-Blanc_Granite           |
| ● 3 : Argentera_granites     | ● 11 : Glarus_Verrucano                                 | ● 18 : Nauders_serpentinite         |
| ● 4 : Arolla_gneiss          | ● 12 : Glockner_serpentinites                           | ● 19 : Oisans_Pelvoux_granites      |
| ● 5 : Belledonne_granites    | ● 13 : Grauwackenzone_porphyroids                       | ● 20 : Salvan-Dorénaz_conglomerate  |
| ● 6 : Bergell_intrusion      | ● 14 : Hercynian_amphibolites_&_amphibole-rich_gneisses | ● 21 : Tauern_window_Central_Gneiss |
| ● 7 : Brixen_granite         | ● 15 : Hochwipfel_formation                             | ● 22 : Vedrette-di-Ries_tonalite    |
| ● 8 : Central_Aar_granite    |                                                         |                                     |

**Figure S2.** Map of all source-to-sink particle trajectories produced for each of the 22 surface rock lithologies selected and mapped as part of the source-to-sink analysis, and for both subglacial and supraglacial particle seeding simulations. The trajectories are color-coded according to the lithologies as indicated by the legend. A map indicating the locations of the source polygons (outcrops) for each lithology is shown in the main paper figure 5. In the above maps, overlapping trajectories are vertically ordered following the same alphabetical order presented in the legend. More precise, high-resolution and more zoomed-in maps showing the pathways of particle trajectories for each of these sources are provided in the source-to-sink catalogue provided in the Zenodo repository associated with this paper: <https://doi.org/10.5281/zenodo.18374156>.

# Modelled density of LGM particle deposits (post glacier retreat)

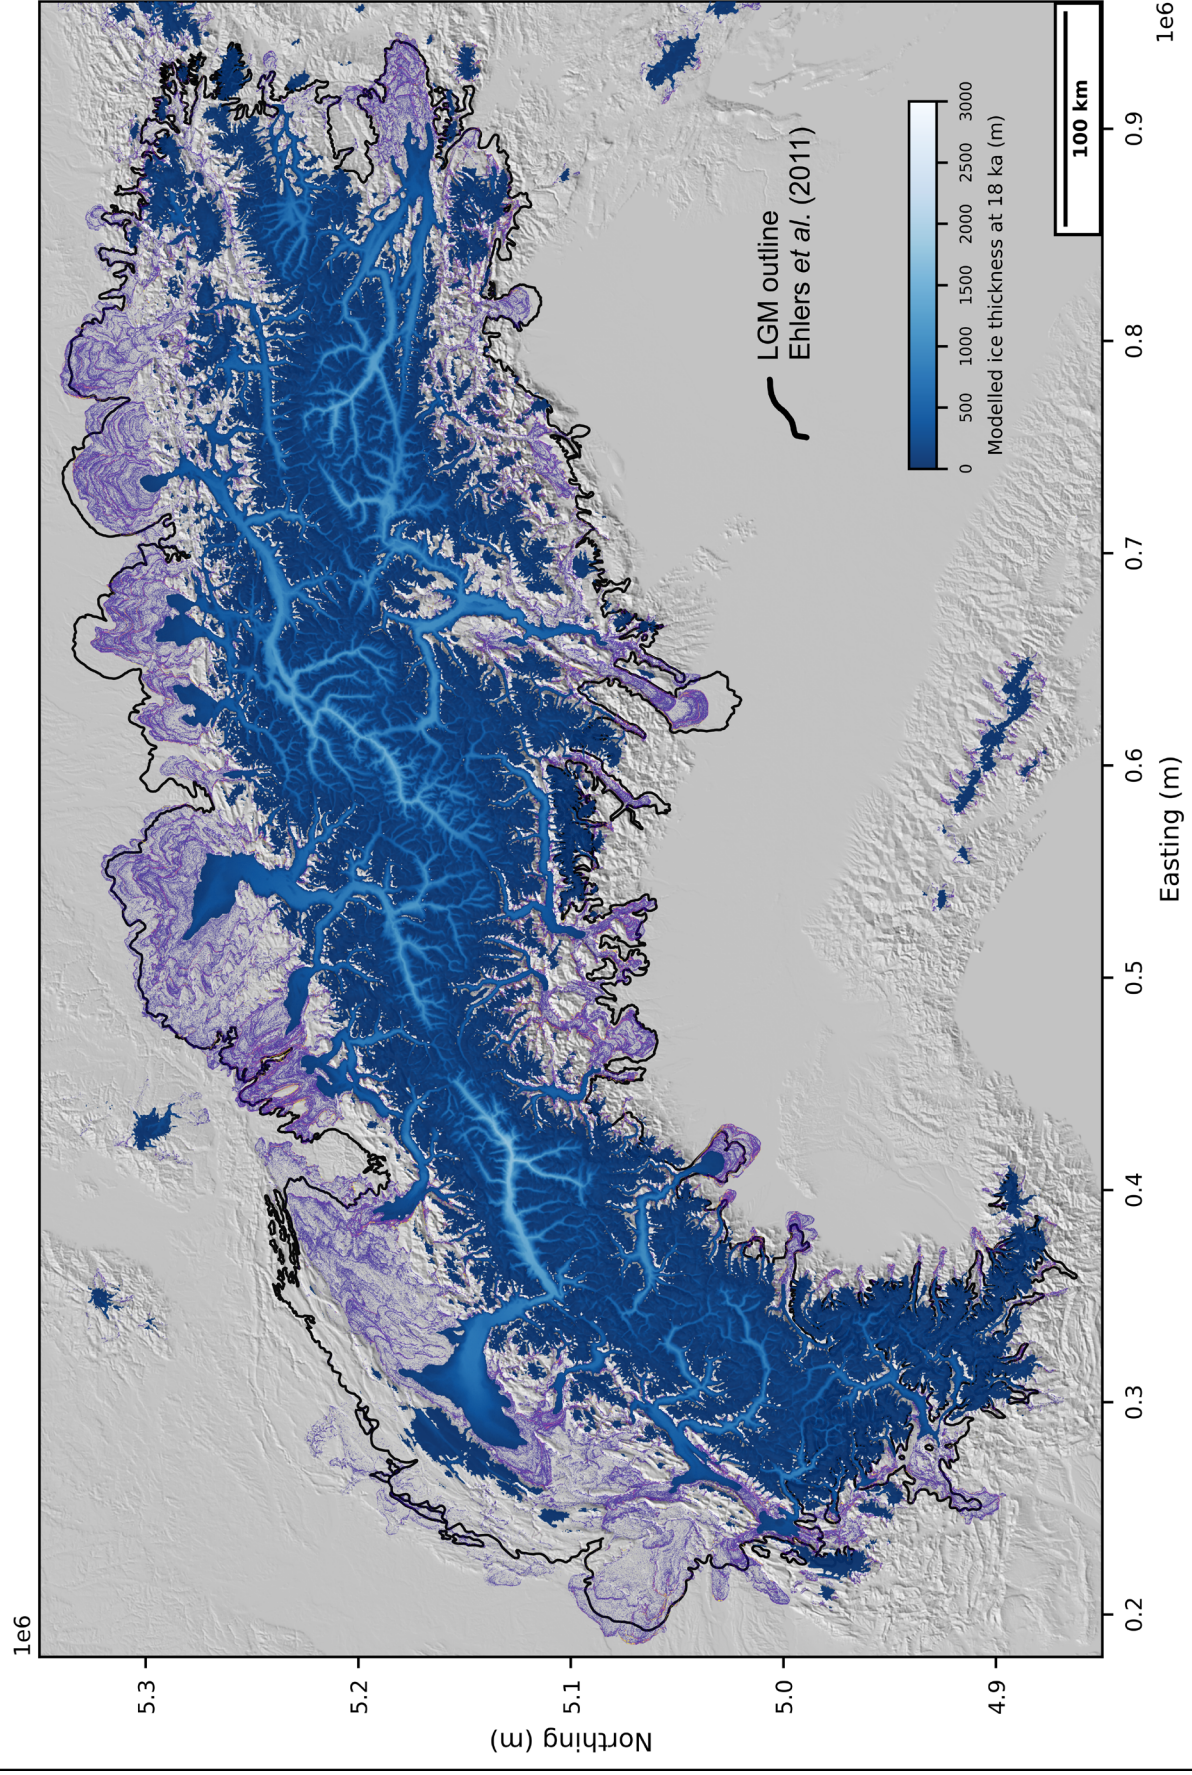

**Figure S3.** Map of modelled particle deposit densities at 18 ka, the final timestep of our AIF simulations of the LGM (40-18 ka), for our entire model domain. The AIF model output is displayed using modelled ice thickness at 18 ka. The particle deposit data shown here combines both datasets of particles seeded subglacially and supraglacially and is expressed in the form of a spatial density map. Each coloured dot is a small hexagon in which the total number of deposited particles is computed. Bright yellow colors indicate hexagons holding the highest concentrations of particles. This model output clearly highlights periods of glacier advances and/or margin stabilization during our AIF model simulations with IGM by forming moraine-like shapes. We argue the novel ability to produce this data over such spatio-temporal scale with Lagrangian particle tracking coupled with glacier evolution modelling opens the door to future model-data comparisons that directly quantify the fit between modelled particle deposits and the preserved glacio-geomorphological record (see Discussion section). This figure caption is also relevant to subsequent Supplementary figures 4-6.

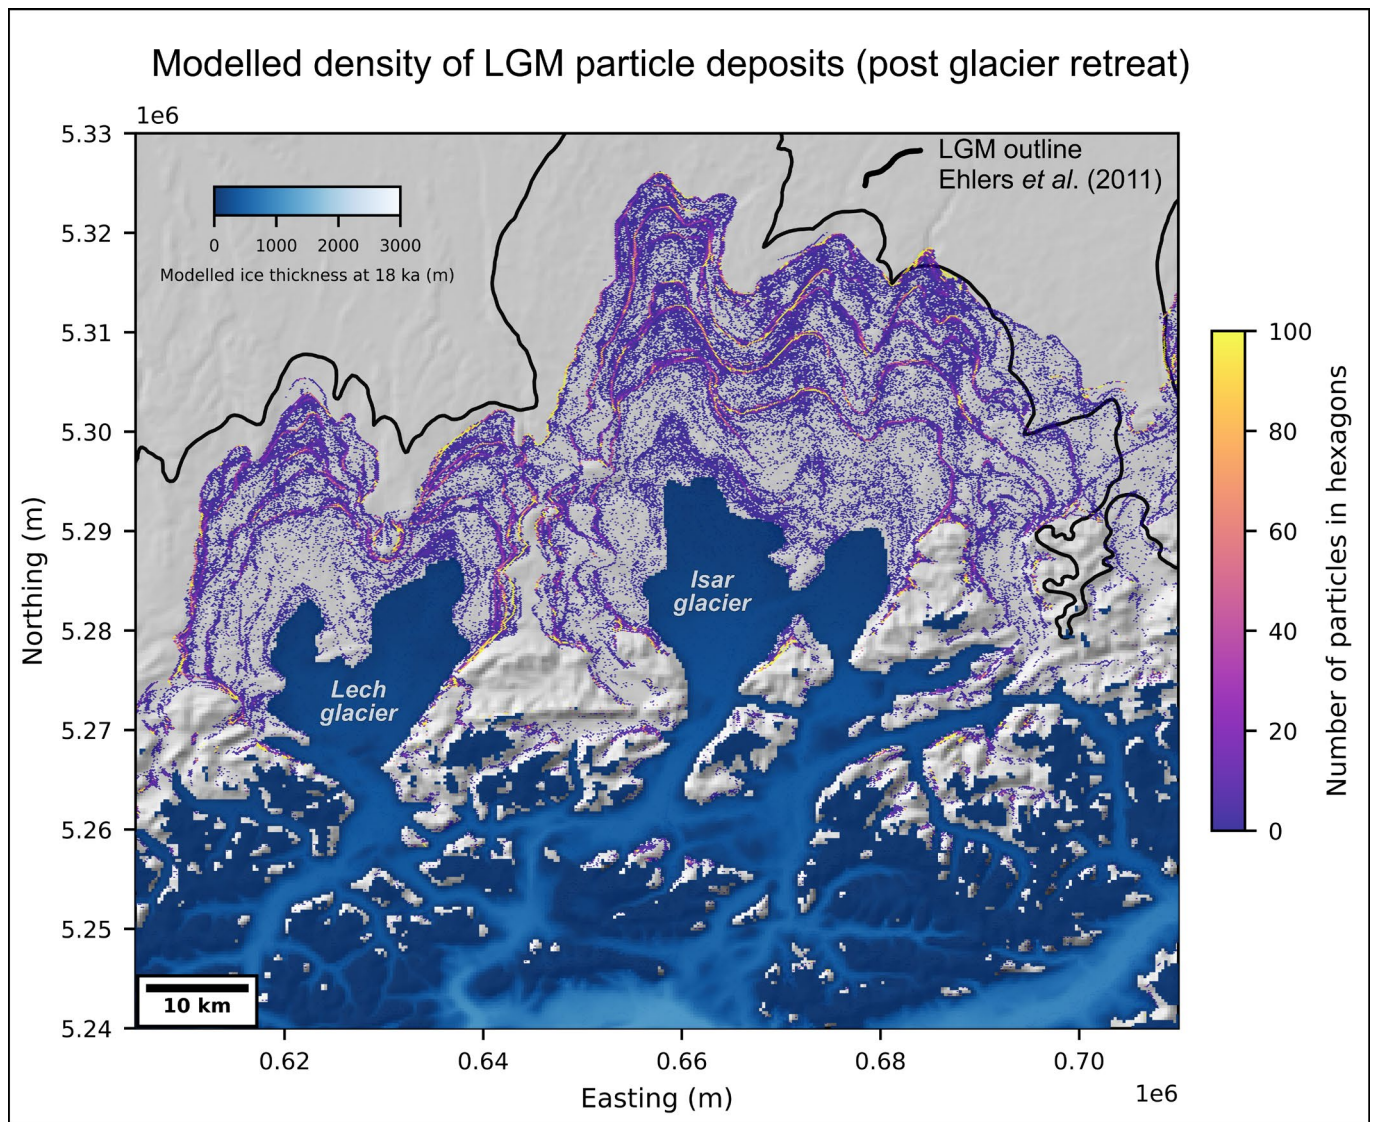

**Figure S4.** Map of modelled particle deposit densities at 18 ka, the final timestep of our AIF simulations of the LGM (40-18 ka), in the foreland region of the Isar outlet glacier. See Figure S3 for the full figure caption.

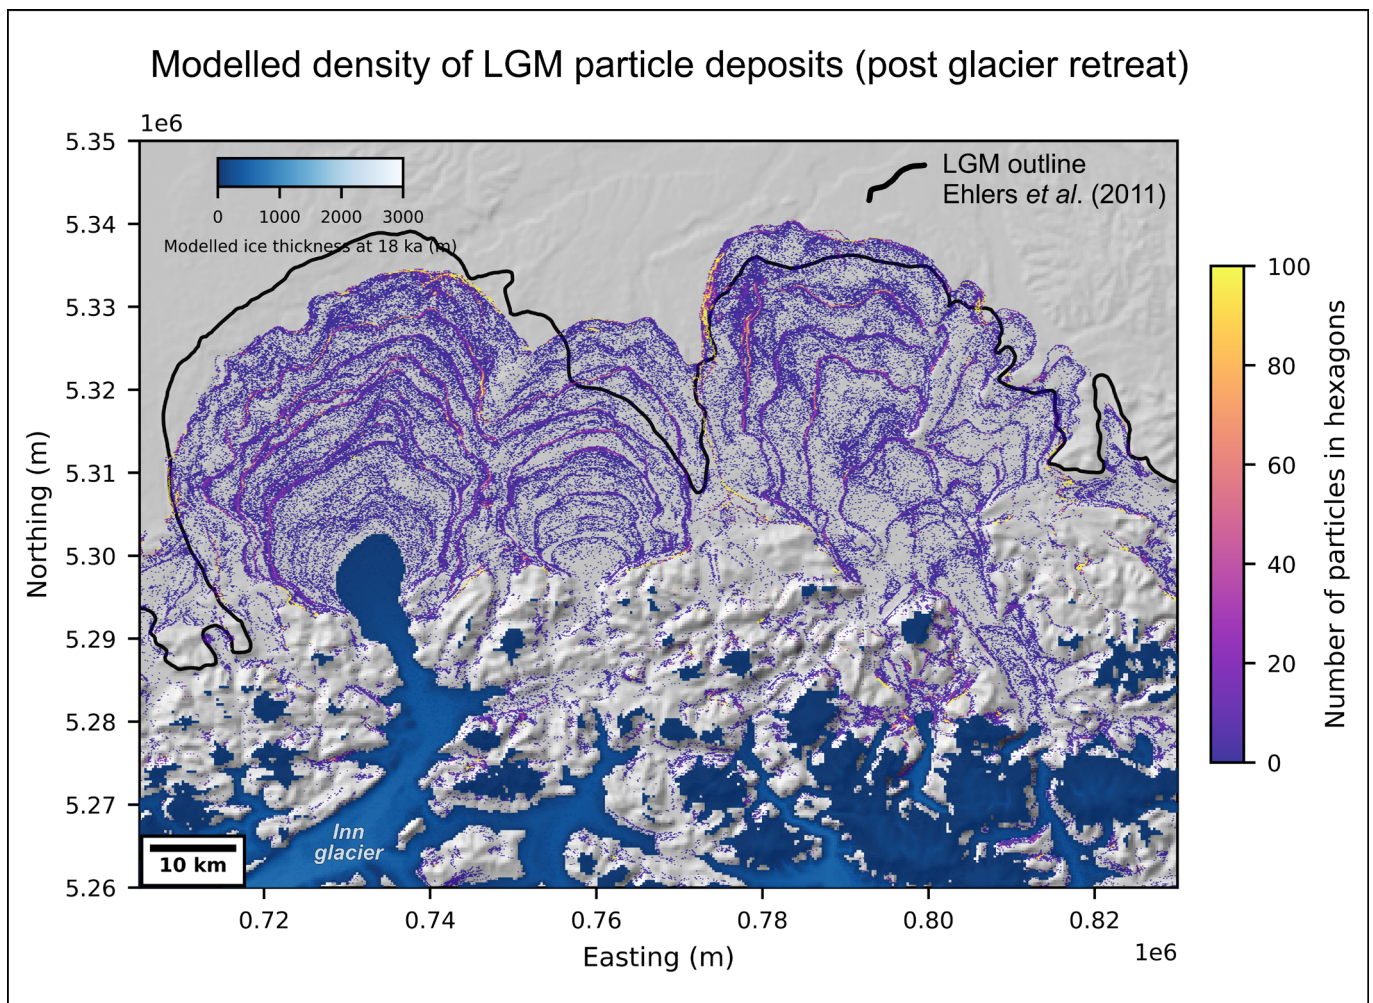

**Figure S5.** Map of modelled particle deposit densities at 18 ka, the final timestep of our AIF simulations of the LGM (40-18 ka), in the foreland region of the Inn and Salzach outlet glaciers. See Figure S3 for the full figure caption.

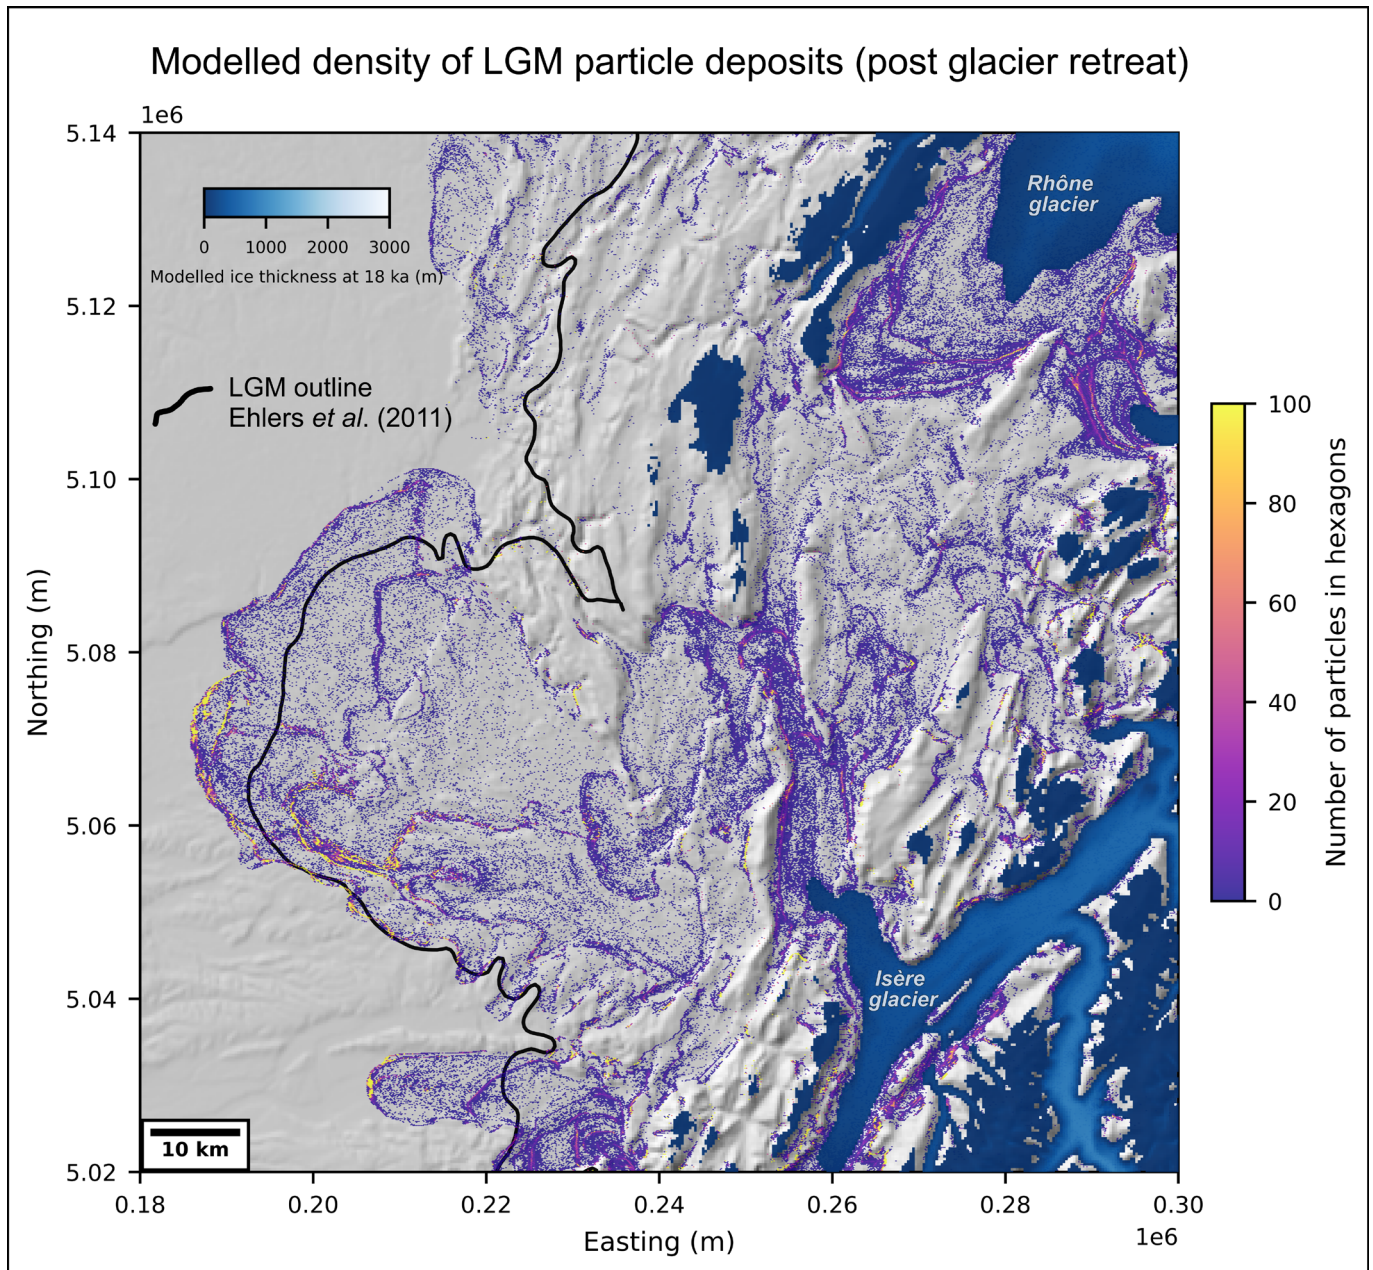

**Figure S6.** Map of modelled particle deposit densities at 18 ka, the final timestep of our AIF simulations of the LGM (40-18 ka), in the foreland region of the Lyon outlet glacier. See Figure S3 for the full figure caption.

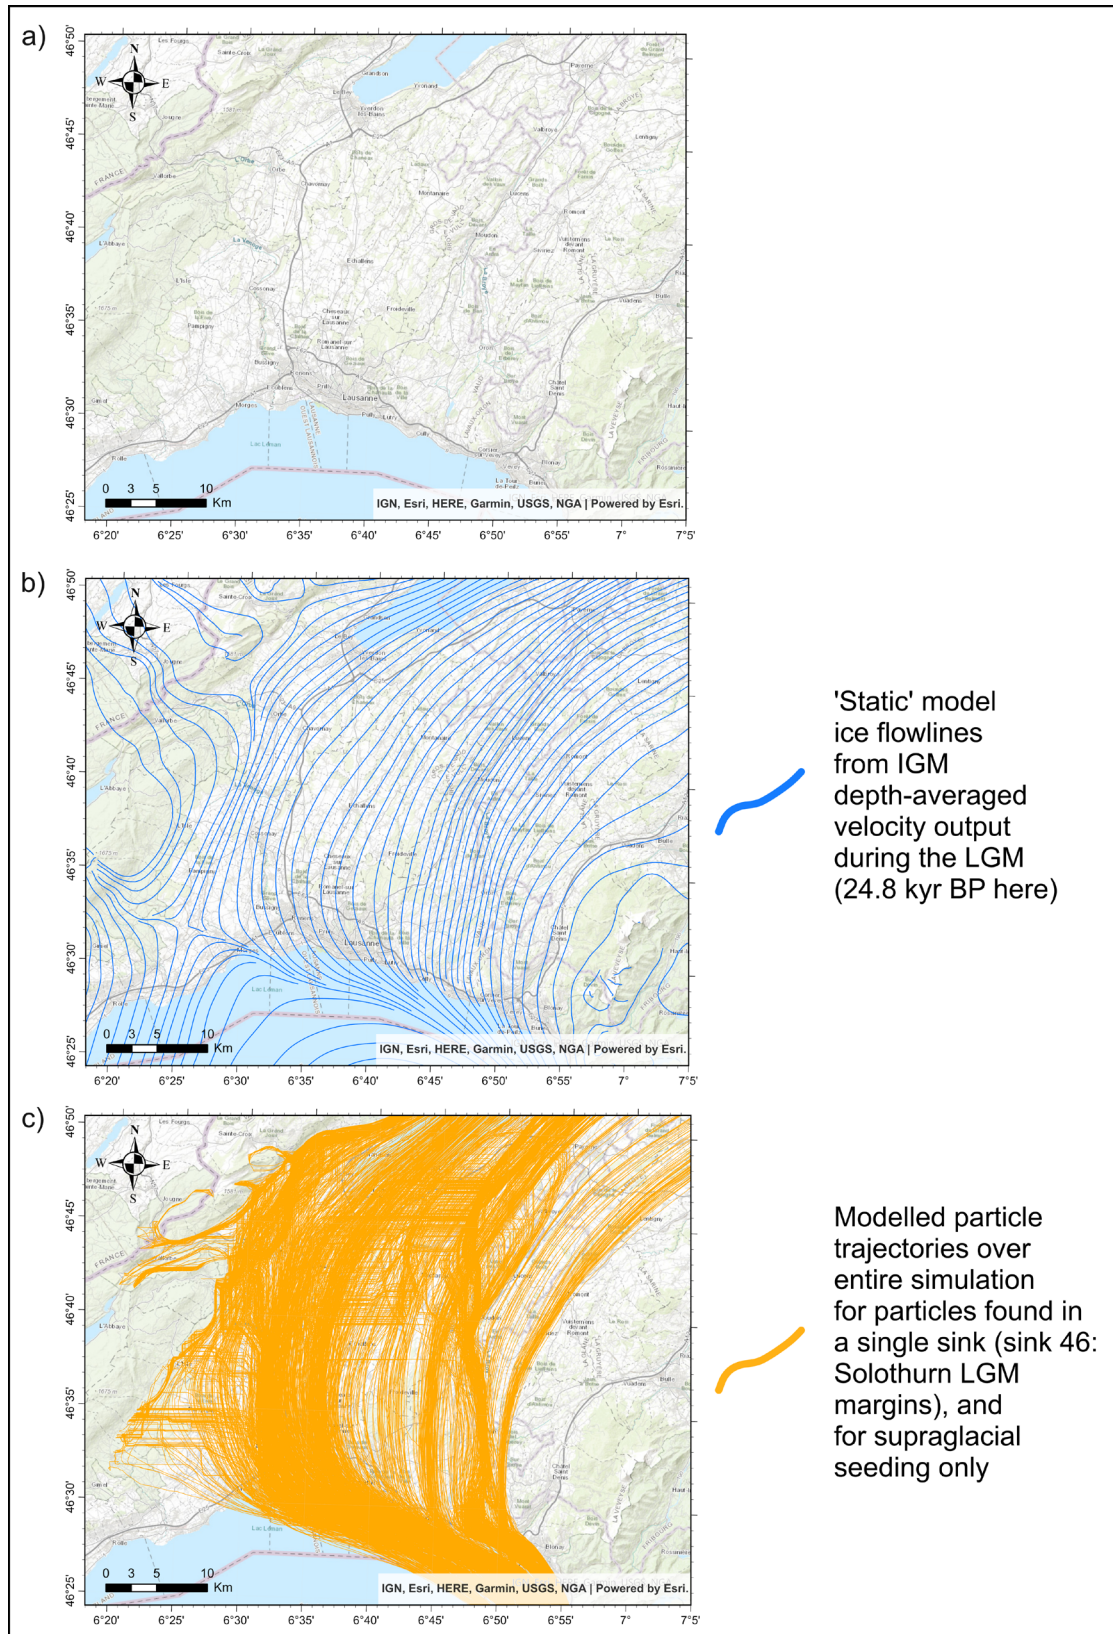

**Figure S7.** Maps illustrating the differences between so-called ‘static’ model flowlines and time-transient 3D particle trajectories, in the region of Lausanne and Yverdon-les-Bains (Vaud, Switzerland). Static flowlines (blue lines in panel b) are simply interpolated from the depth-averaged velocity field of the entire modelled AIF at a single time frame (in a post-processing manner), in this case at 24.8 ka: the timing of modelled maximum AIF volume. They only enable us to visualize the direction of ice-flow during that single model time frame. However, true ice flow directionality changes dynamically in time, as the AIF geometry evolves, and is also dependent on the height location of a specific ice entity through the ice column. 3D particle trajectories (orange lines in panel c), which we produce in this study, take into account this complexity. Here, we only show the trajectories of particles found in a single sink (sink 46).

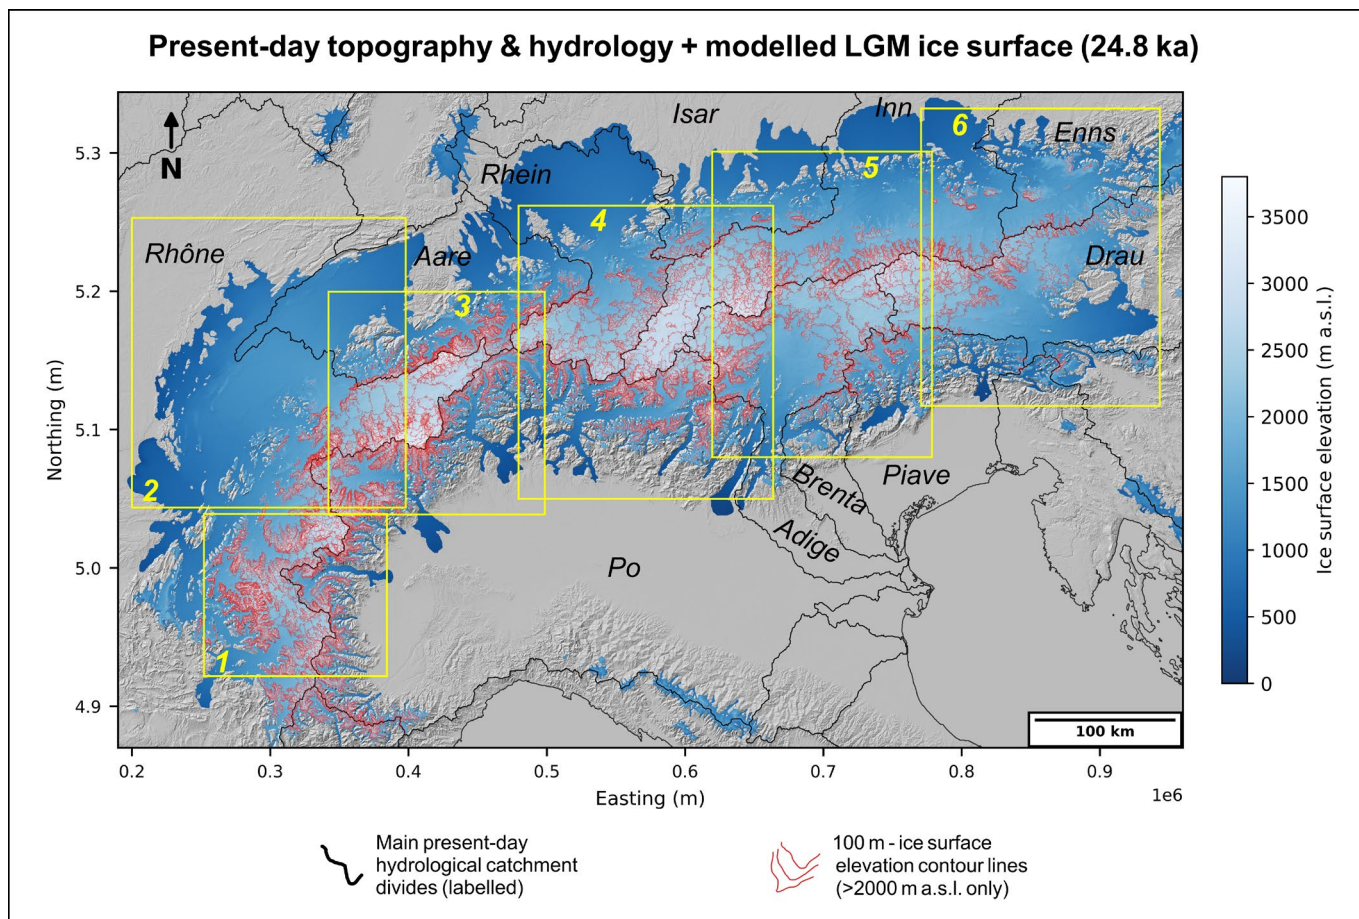

**Figure S8.** Map of modelled ice surface elevation during the modelled maximum LGM expansion of the Alpine Ice Field in Leger et al. (2025)'s best scoring simulation (ensemble simulation 37). This map highlights the locations of main Alpine ice domes during the LGM according to the model. It also displays the largest present-day hydrological basins in the Alps and their divides used in this study for detecting major ice transfluences when analyzing glacially transported particle trajectories crossing major hydrological divides. The yellow boxes indicate the locations of the 6 maps presented directly below; also downloadable at higher-resolution from the ice-transfluence catalogue provided in the Zenodo repository attached to this paper: <https://doi.org/10.5281/zenodo.18374156>.

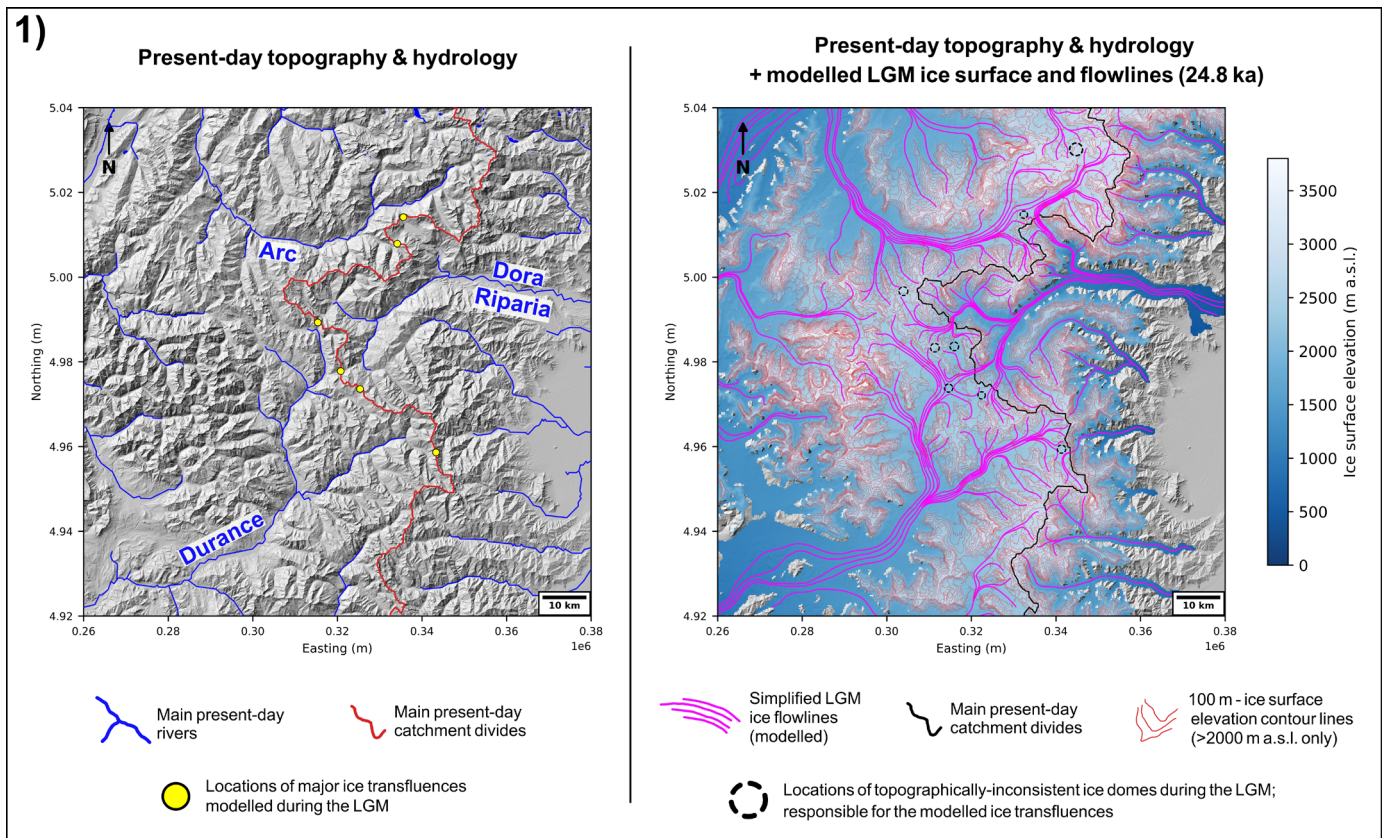

**Figure S9.** Map of modelled ice surface elevations and simplified ‘static’ ice flowlines (pink lines) during the LGM (~24.8 ka) in the southwestern region of the Alpine Ice Field, enabling to map the locations of modelled ice transfluences (yellow dots on left-hand map). These modelled transfluences can explain the complex and puzzling provenances of certain ice-contact deposits. They are here only quantified for the largest river catchments of the Alps (see Figure S8), whose divides are shown by the red line on the left-hand map, and black line on the right-hand map. Note that whilst useful for the visual purpose of this figure, the simplified glacier flowlines (pink lines) shown here are drawn from so-called ‘static’ flowlines, which are non-time-transient and only obtained from the depth-averaged ice velocity field modelled during the single time frame of maximum AIF volume; at 24.8 ka. These should only be considered useful in this figure to visualize the modelled flow direction of ice at the precise locations of transfluences and only during the peak of the modelled LGM. The substantially more complex and more accurate time-transient flow trajectories obtained from 3D Lagrangian particle tracking, displayed in the main paper Figs. 6, 9, for example, are more diverse but would make visualizing transfluences on a figure impossible given the large number of modelled particles and resulting cross-cutting trajectories (see Figure S7). This caption is also relevant to subsequent Figures S10-14.

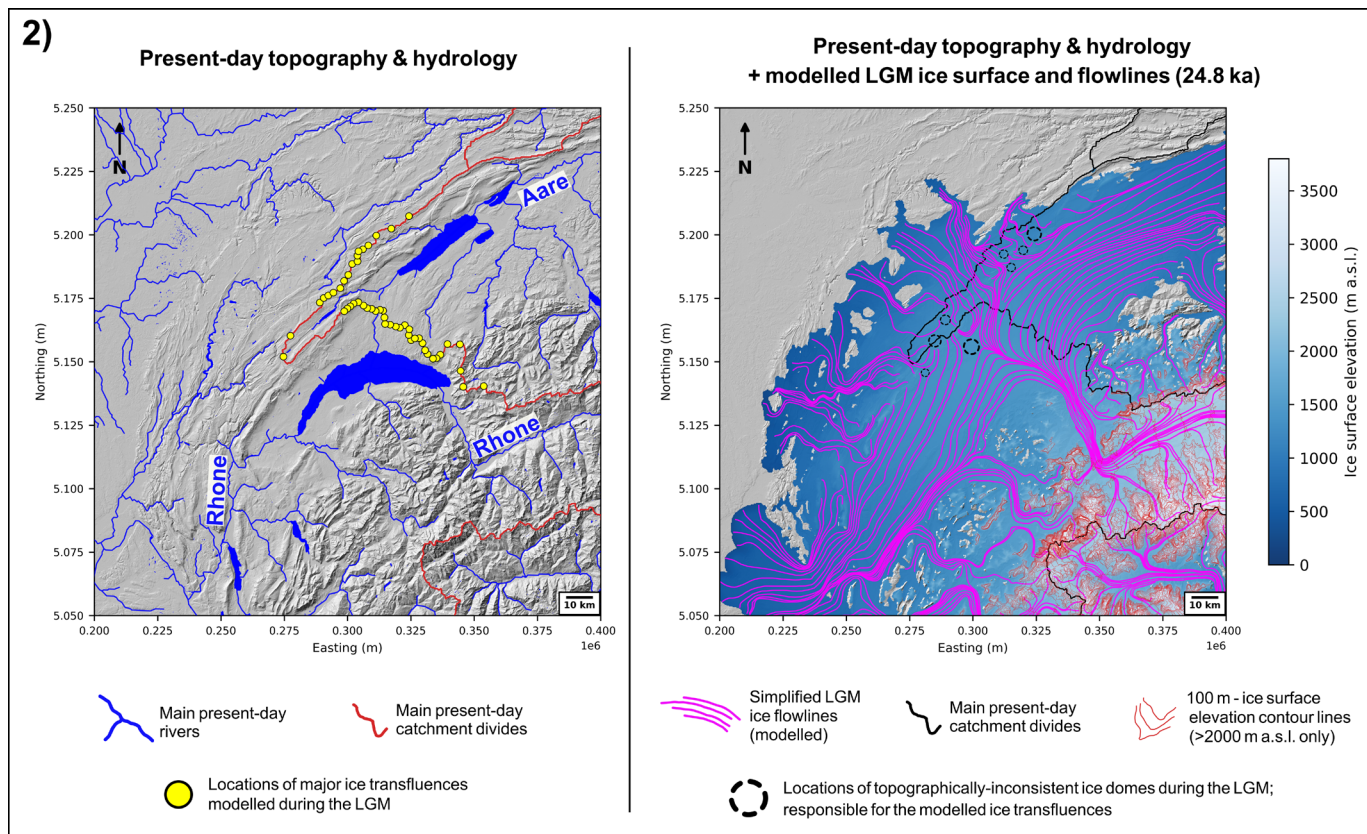

**Figure S10.** Map of modelled ice surface elevations and simplified ‘static’ ice flowlines (pink lines) during the LGM (~24.8 ka) in the Geneva Lake / Jura region of the Alpine Ice Field, enabling to map the locations of modelled ice transfluences (yellow dots on left-hand map). See Figure S9 for the full figure caption.

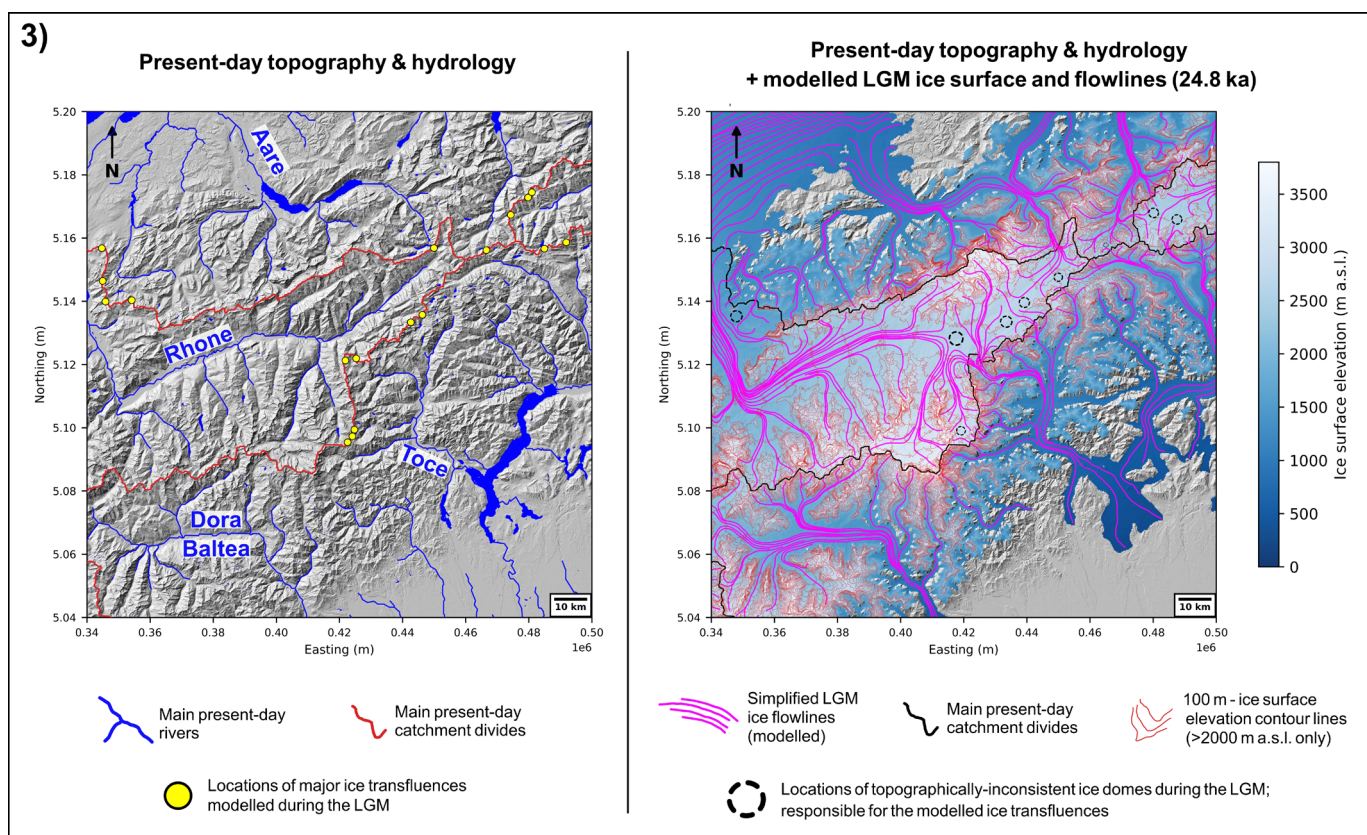

**Figure S11.** Map of modelled ice surface elevations and simplified ‘static’ ice flowlines (pink lines) during the LGM (~24.8 ka) in the region of the ‘Rhône’ ice dome, enabling to map the locations of modelled ice transfluences (yellow dots on left-hand map). See Figure S9 for the full figure caption.

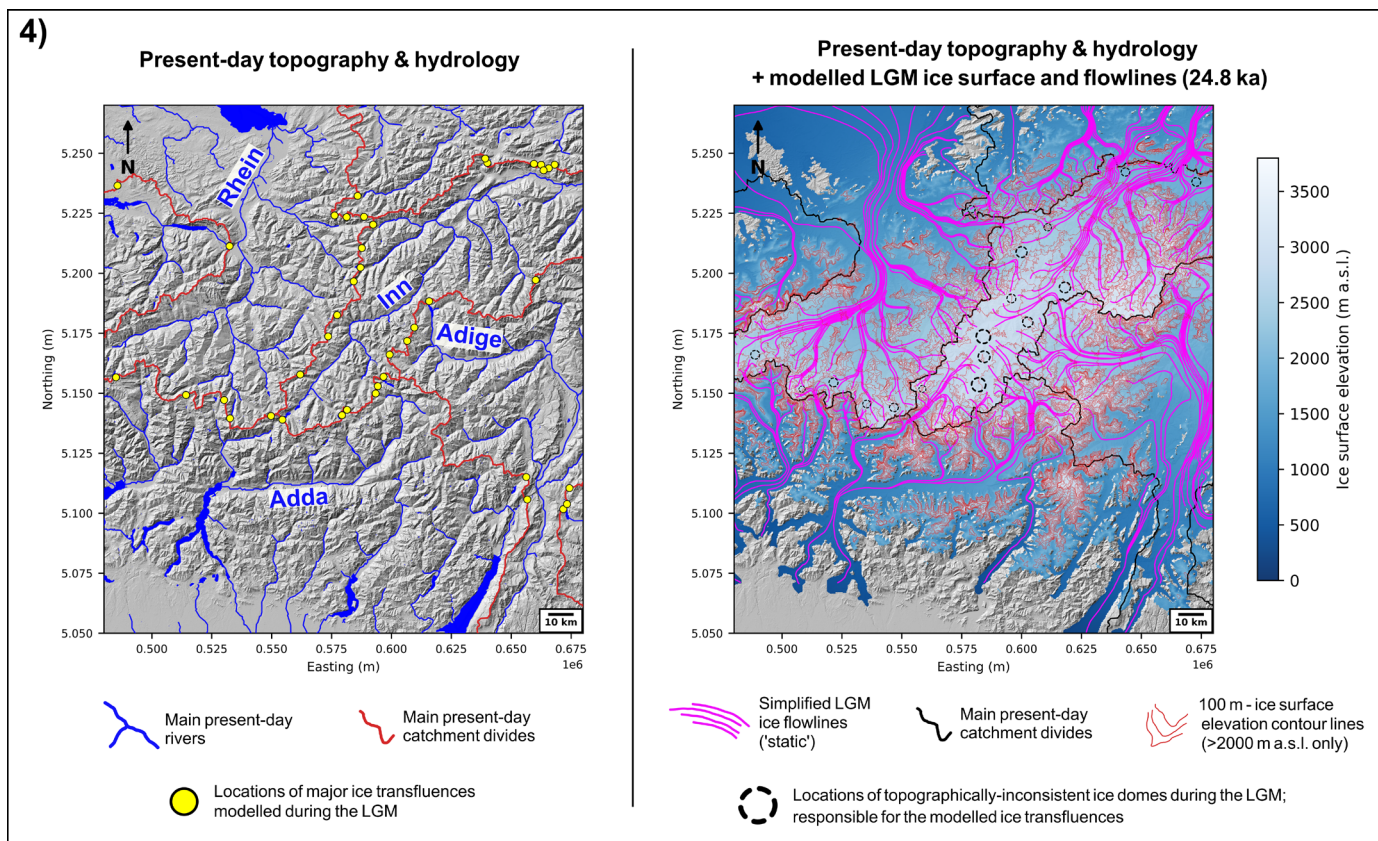

**Figure S12.** Map of modelled ice surface elevations and simplified 'static' ice flowlines (pink lines) during the LGM (~24.8 ka) in the region of the 'Engadin' ice dome, enabling to map the locations of modelled ice transfluences (yellow dots on left-hand map). See Figure S9 for the full figure caption.

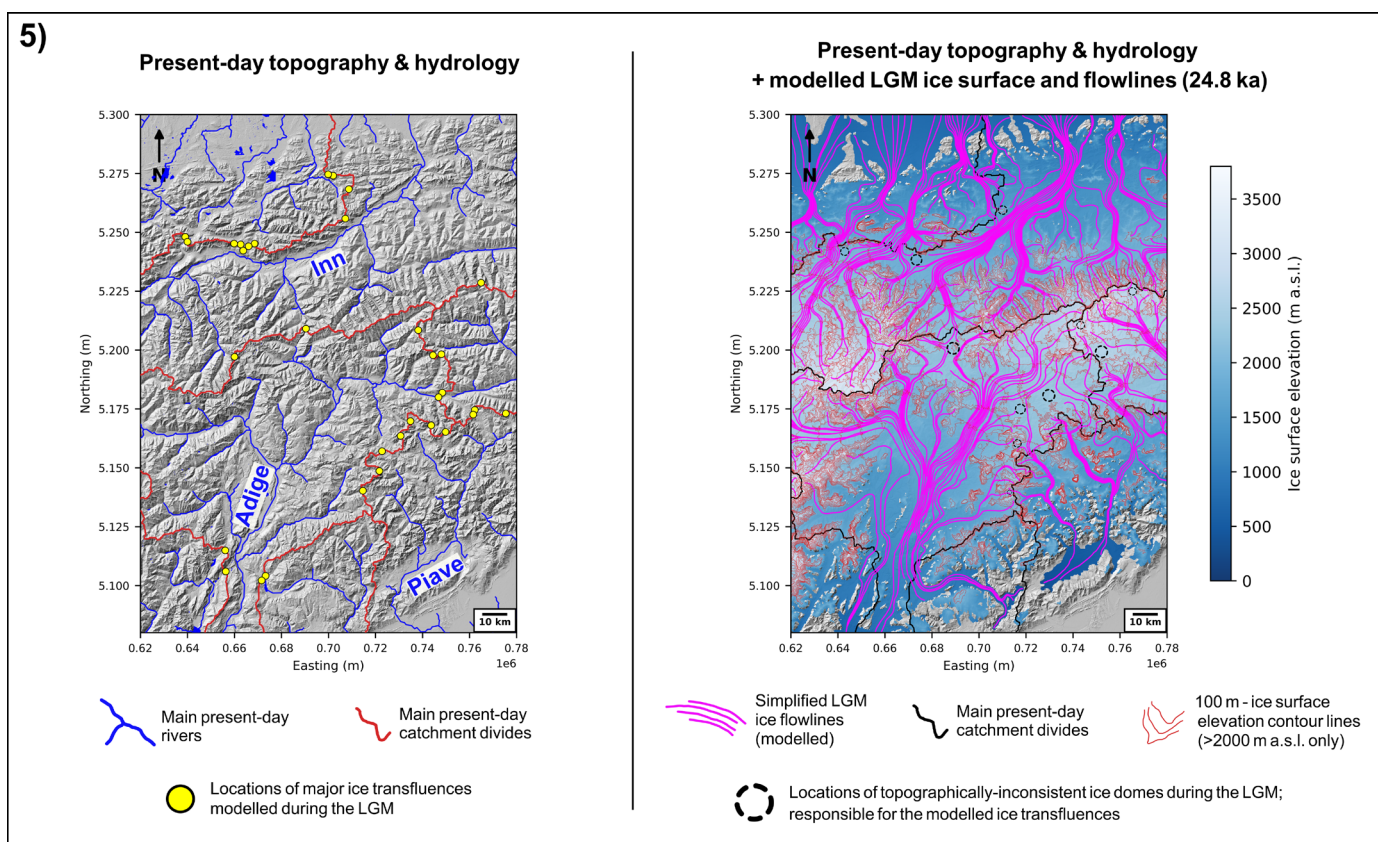

**Figure S13.** Map of modelled ice surface elevations and simplified 'static' ice flowlines (pink lines) during the LGM (~24.8 ka) in the region of the 'Isarco ice dome', enabling to map the locations of modelled ice transfluences (yellow dots on left-hand map). See Figure S9 for the full figure caption.

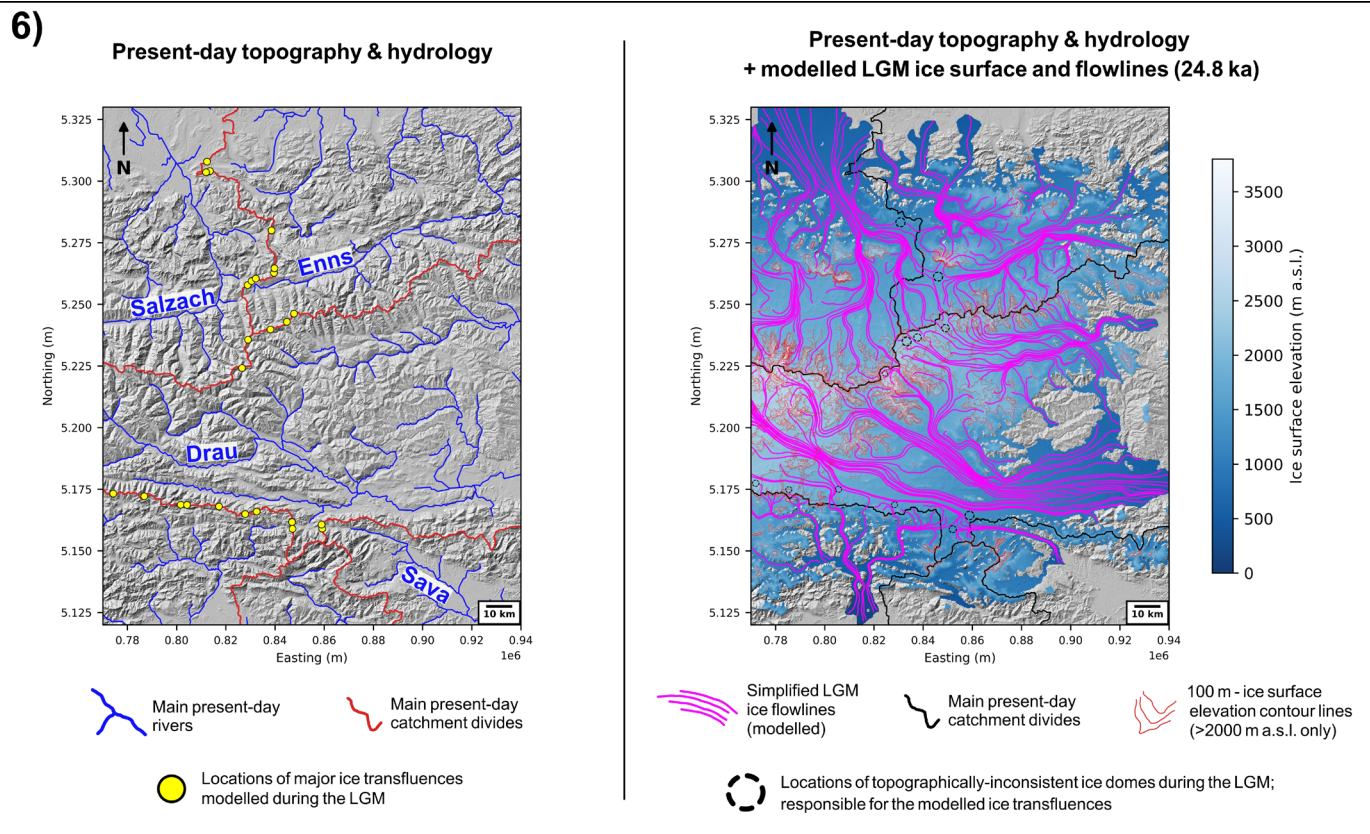

**Figure S14.** Map of modelled ice surface elevations and simplified ‘static’ ice flowlines (pink lines) during the LGM (~24.8 ka) in the easternmost region of the Alpine Ice Field, enabling to map the locations of modelled ice transfluences (yellow dots on left-hand map). See Figure S9 for the full figure caption.
